# Supplementary material for: A diquinone–imidazole ensemble for selective colorimetric sensing of cyanide in aqueous medium via anion induced NIR absorption
Source: Royal Society of Chemistry journal article supplement (doi:10.1039/c6ra00677a), 2016-01-01
Supplement: c6ra00677a1.pdf [file c6ra00677a1.pdf]

## Supporting Information

| Figure No. | Content                                                                                                                | Page No. |
|------------|------------------------------------------------------------------------------------------------------------------------|----------|
| S1         | Colour changes observed for <b>R</b> at different pH values: A) free <b>R</b> and B) after the addition of cyanide ion | 2        |
| S2         | Job's plot for the receptor-cyanide complex                                                                            | 3        |
| S3         | Scott linear plot of <b>R</b> with CN <sup>-</sup> ion                                                                 | 4        |
| S4         | Bensi-Hildebrand plot of <b>R</b> with CN <sup>-</sup> ion                                                             | 5        |
| S5         | Plot of fluorescence intensity versus absorbance for Quinine sulphite                                                  | 6        |
| S5         | Plot of fluorescence intensity versus absorbance for free receptor <b>R</b>                                            | 7        |
| S7         | Plot of fluorescence intensity versus absorbance for receptor-CN <sup>-</sup> complex                                  | 8        |
| S8         | <sup>1</sup> H NMR spectrum of <b>R</b> with addition of 0.5 eqv. of TBACN in DMSO-d <sub>6</sub>                      | 9        |
| S9         | <sup>1</sup> H NMR spectrum of <b>R</b> with addition of 1 eqv. of TBACN in DMSO-d <sub>6</sub>                        | 10       |
| S10        | <sup>1</sup> H NMR spectrum of <b>R</b> with addition of 2 eqv. of TBACN in DMSO-d <sub>6</sub>                        | 11       |
| S11        | Optimized geometry diagram of <b>R</b> +CN <sup>-</sup> complex                                                        | 12       |
| S12        | Optimized geometry and HOMO-LUMO of <b>V</b> and its CN <sup>-</sup> complex                                           | 13       |
| S13        | Optimized geometry and HOMO-LUMO of <b>VI</b> and its CN <sup>-</sup> complex                                          | 14       |
| S14        | <sup>1</sup> H NMR spectrum of <b>1</b>                                                                                | 15       |
| S15        | <sup>1</sup> H NMR spectrum of <b>R</b>                                                                                | 16       |
| S16        | LCMS spectrum of <b>R</b>                                                                                              | 17       |

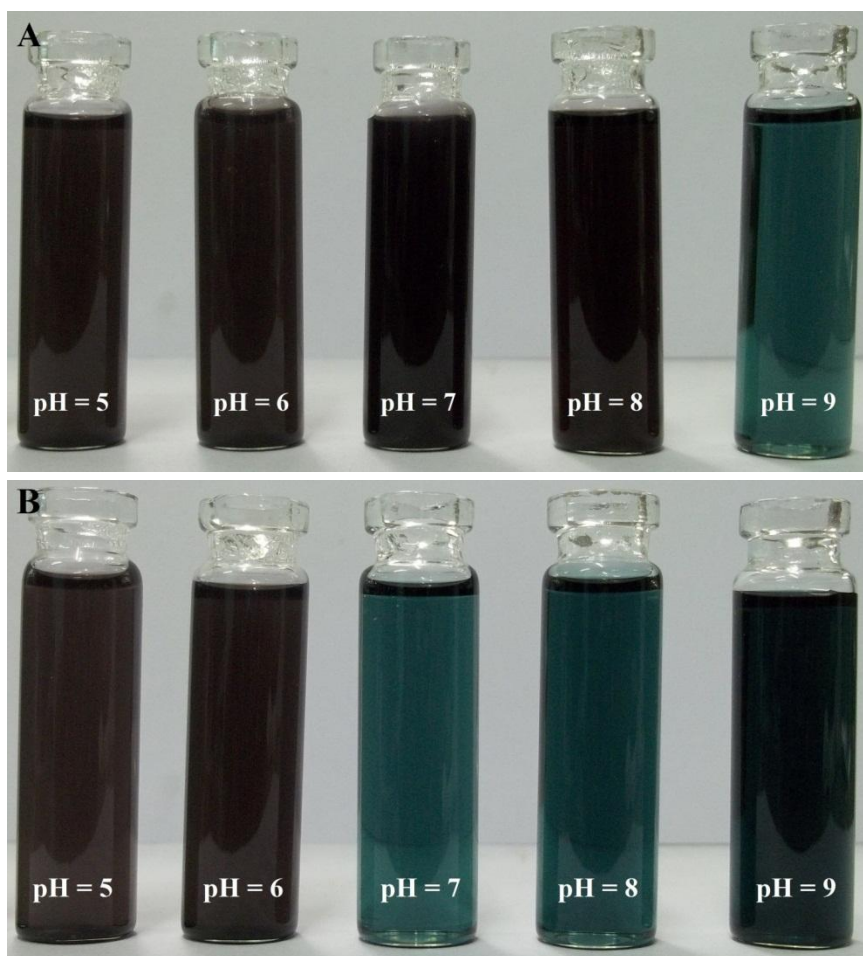

**Fig. S1.** Colour changes observed for **R** at different pH values: A) free **R** and B) after the addition of cyanide ion.

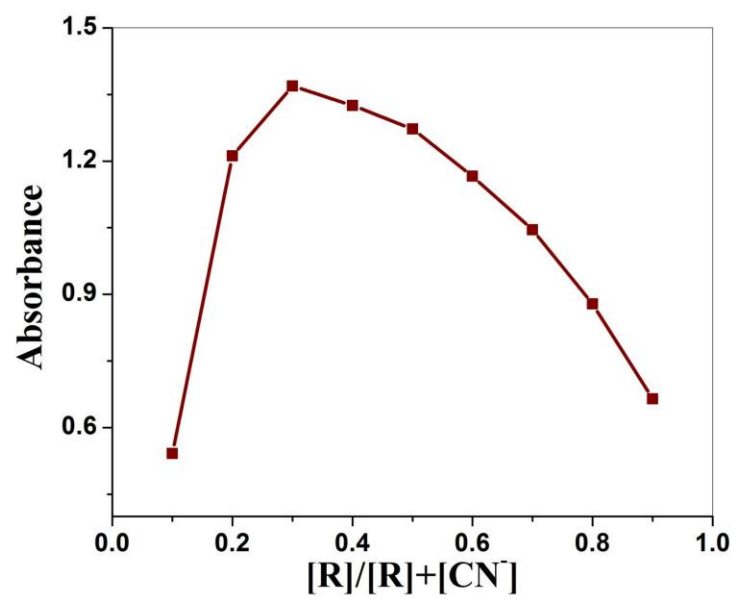

**Fig. S2.** Job's plot for the receptor-cyanide complex

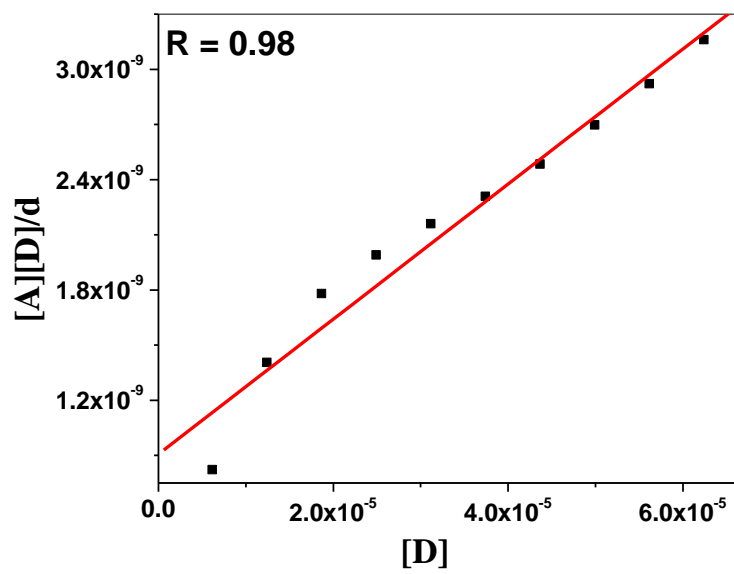

**Fig. S3.** Scott linear plot of  $R$  with  $\text{CN}^-$  ion

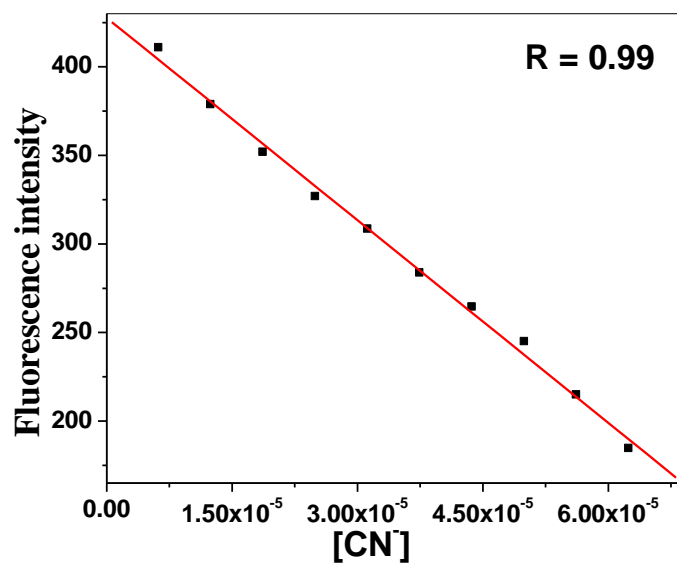

**Fig. S4.** Bensi-Hildebrand plot of **R** with  $\text{CN}^-$  ion

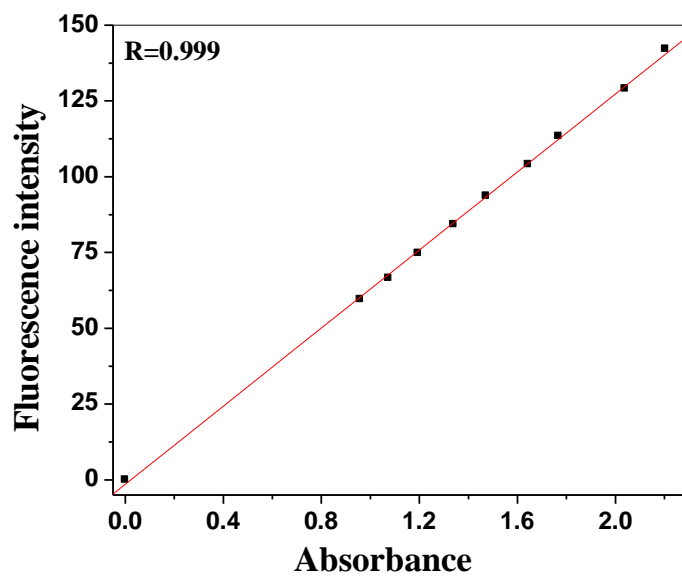

**Fig. S5.** Plot of fluorescence intensity versus absorbance for Quinine sulphite

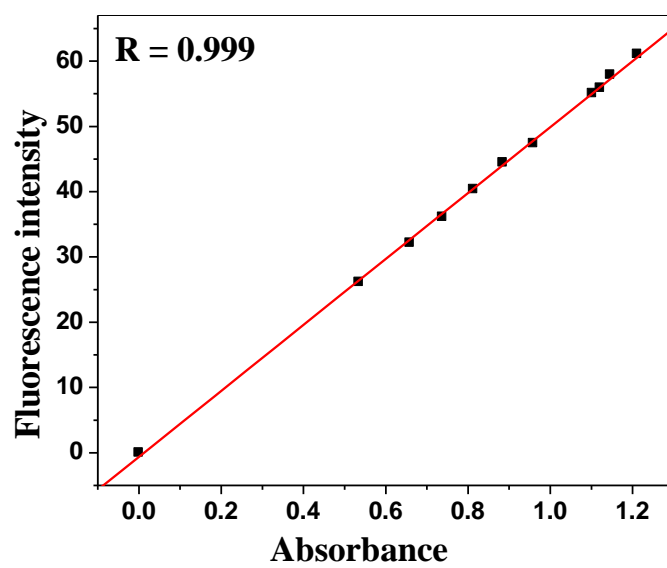

**Fig. S6.** Plot of fluorescence intensity versus absorbance for free receptor **R**

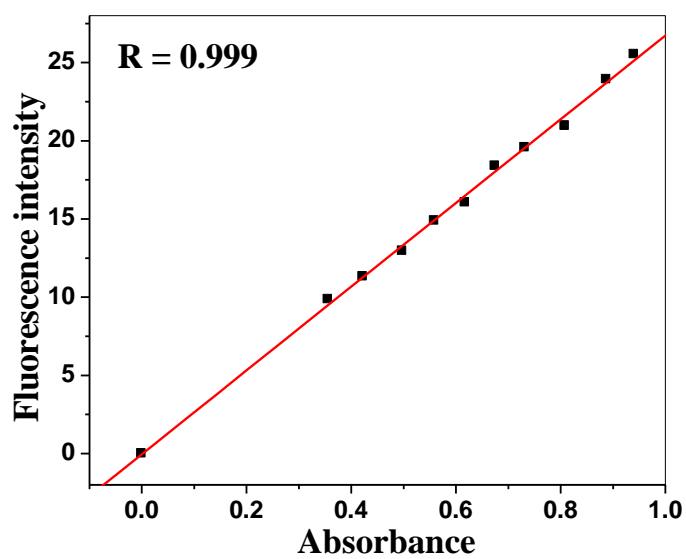

**Fig. S7.** Plot of fluorescence intensity versus absorbance for **R-CN<sup>-</sup>** complex



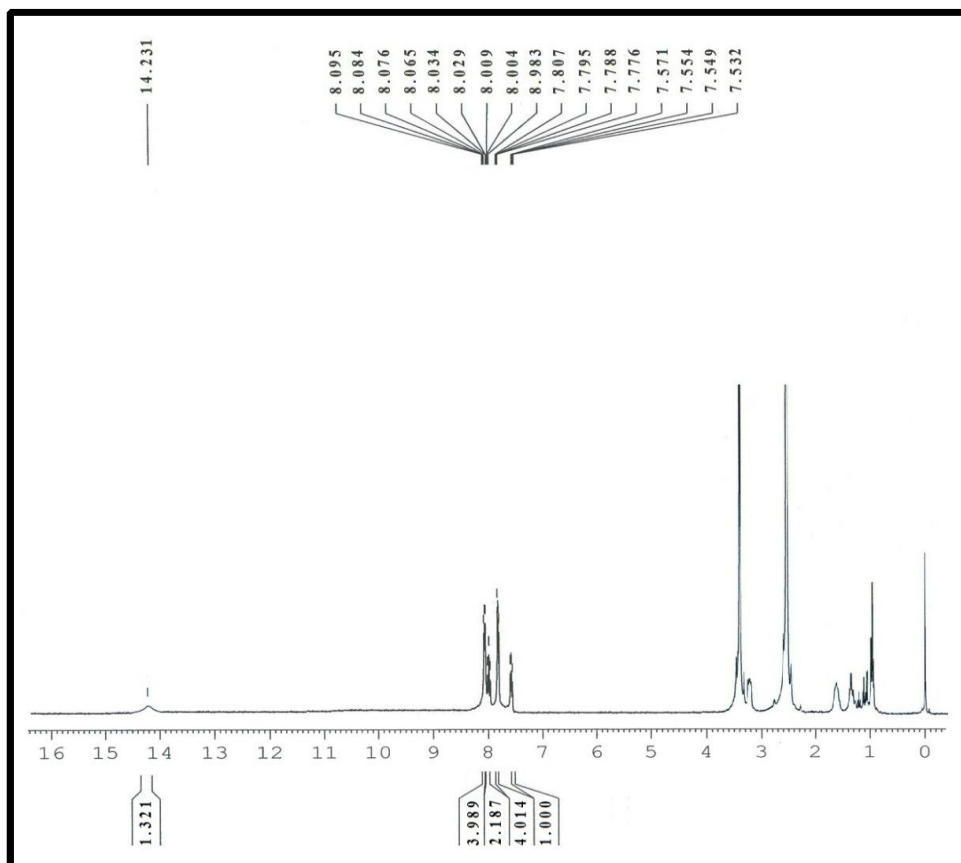

**Fig. S8.**  $^1\text{H}$  NMR spectrum of **R** with addition of 0.5 eqv. of TBACN in  $\text{DMSO-d}_6$ .

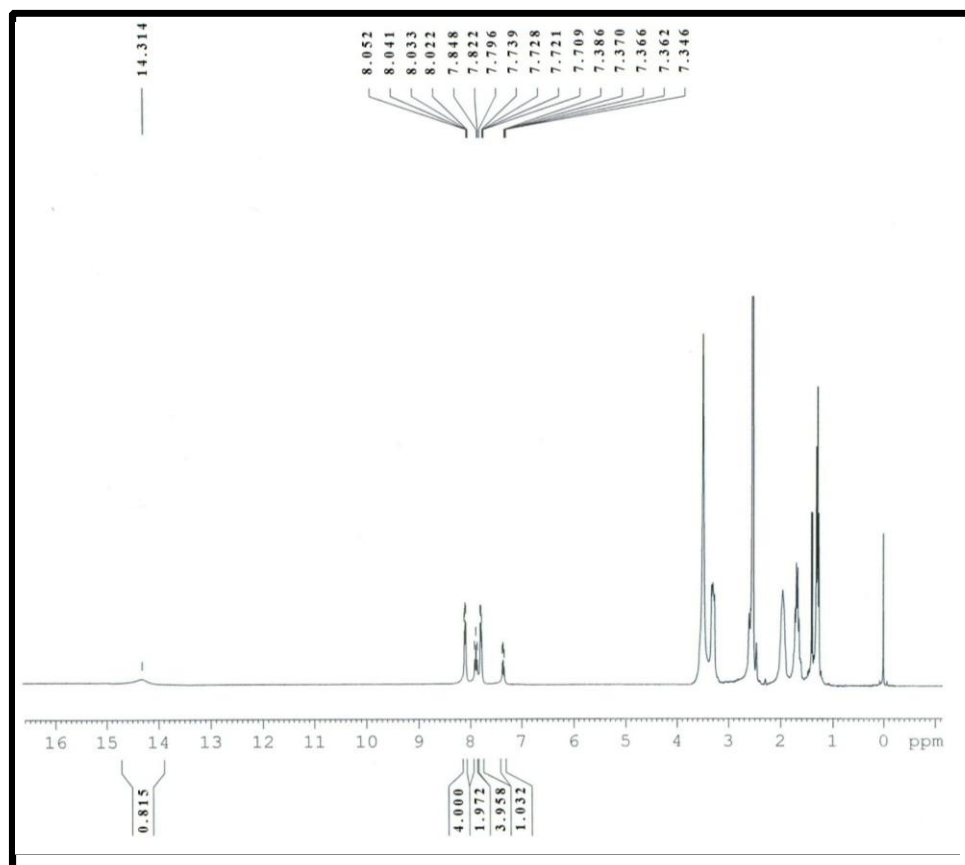

**Fig. S9.**  $^1\text{H}$  NMR spectrum of **R** with addition of 1 eqv. of TBACN in  $\text{DMSO-d}_6$ .

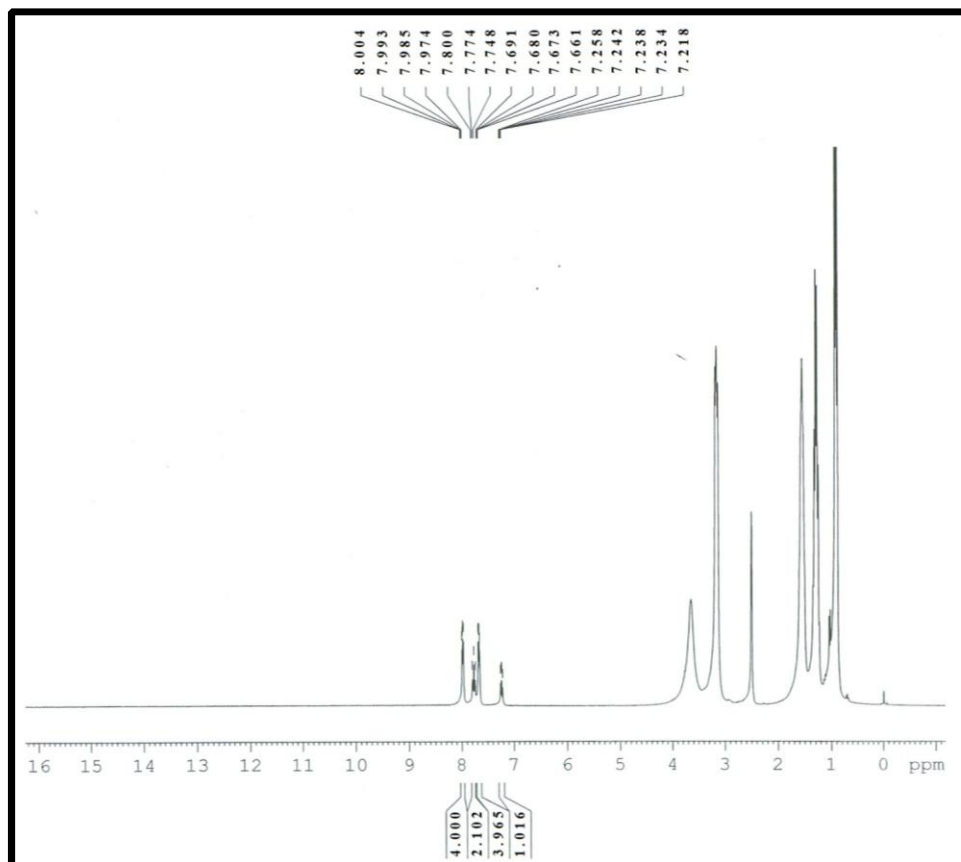

**Fig. S10.**  $^1\text{H}$  NMR spectrum of **R** with addition of 2 eqv. of TBACN in  $\text{DMSO-d}_6$ .

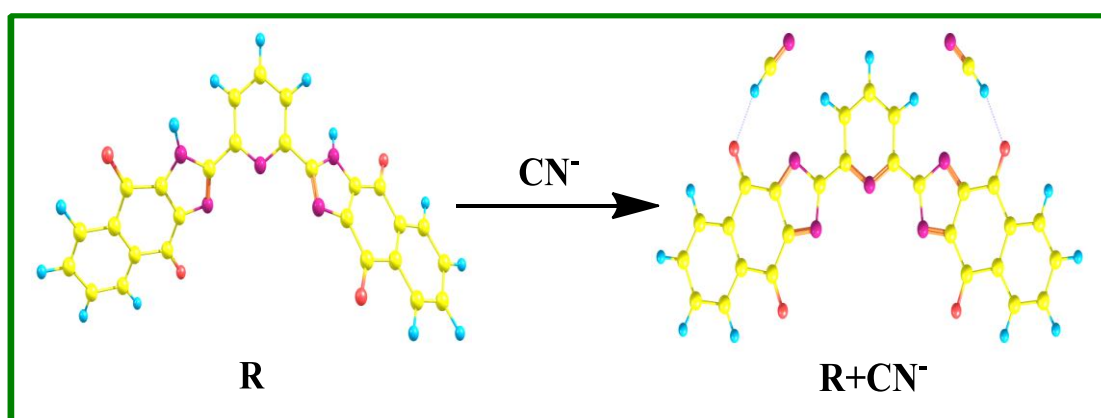

**Fig. S11.** Optimized geometry of **R-CN<sup>-</sup>** complex

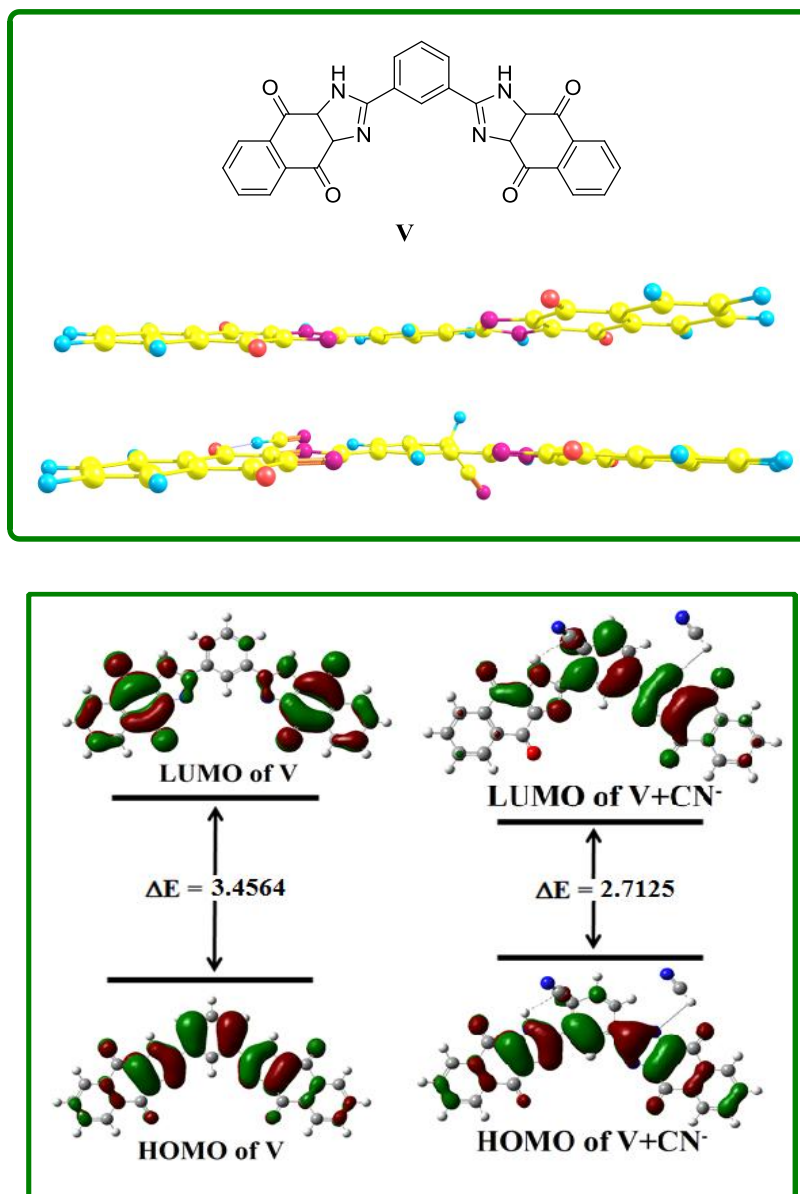

**Fig. S12.** Optimized geometry and HOMO-LUMO of V and its CN<sup>-</sup> complex

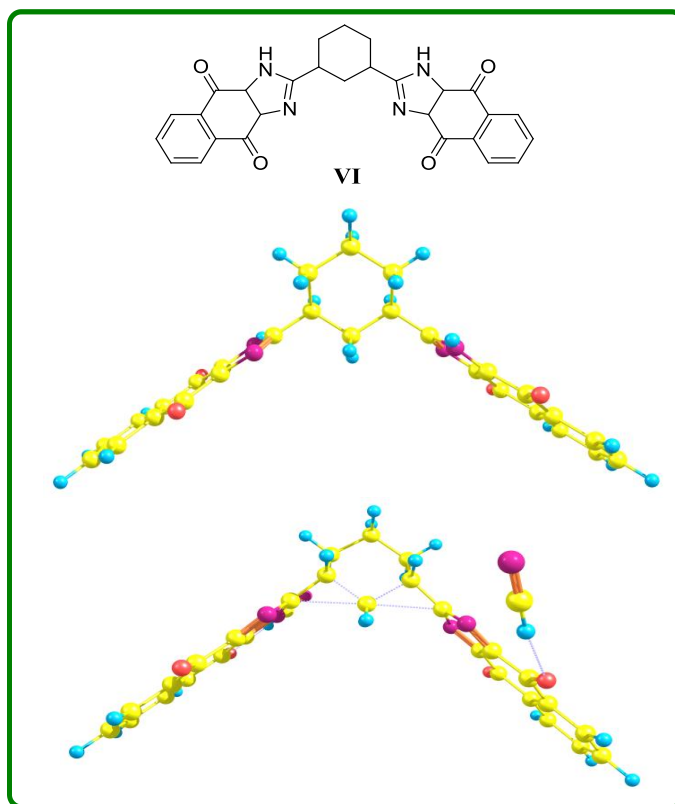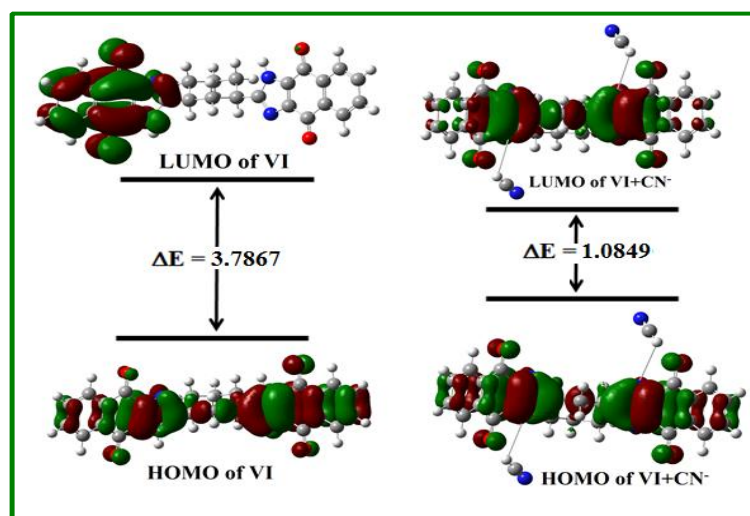

**Fig. S13.** Optimized geometry and HOMO-LUMO of VI and its  $\text{CN}^-$  complex

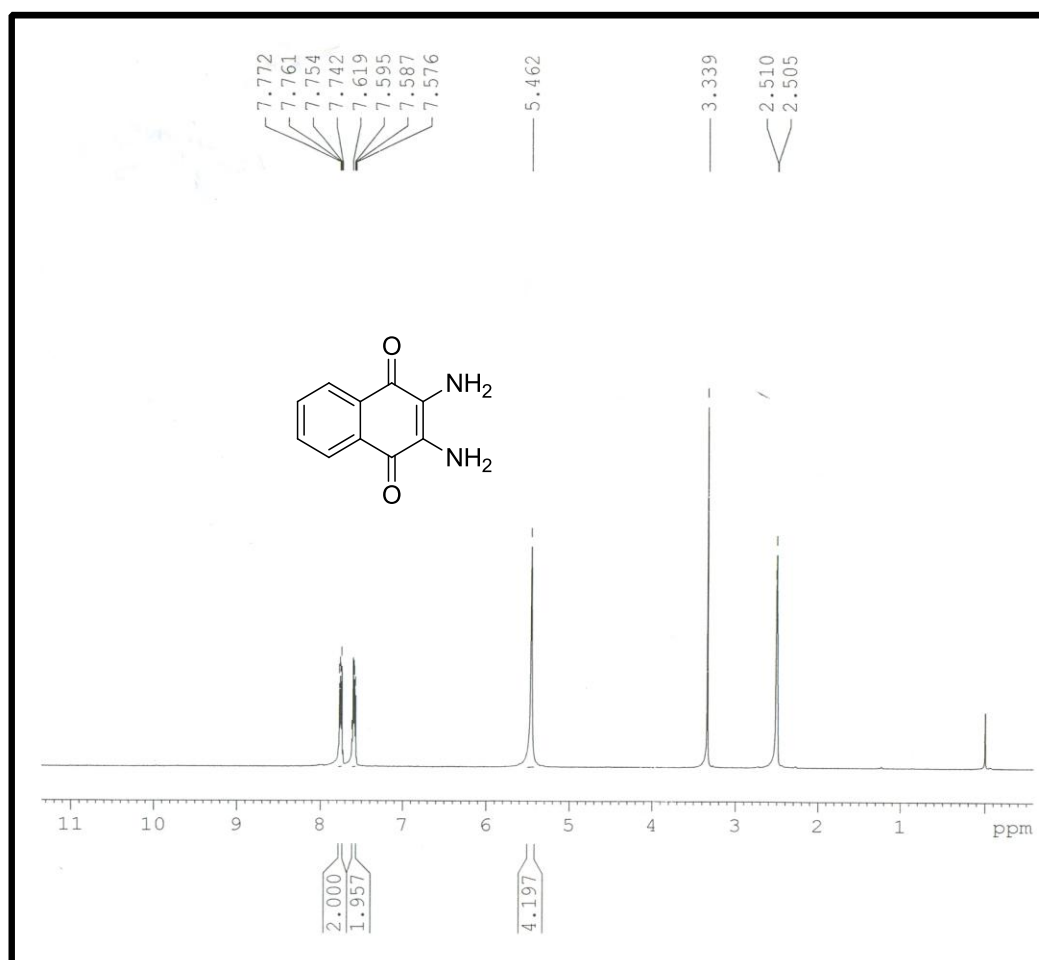

Fig. S14.  $^1\text{H}$  NMR spectrum of **1**

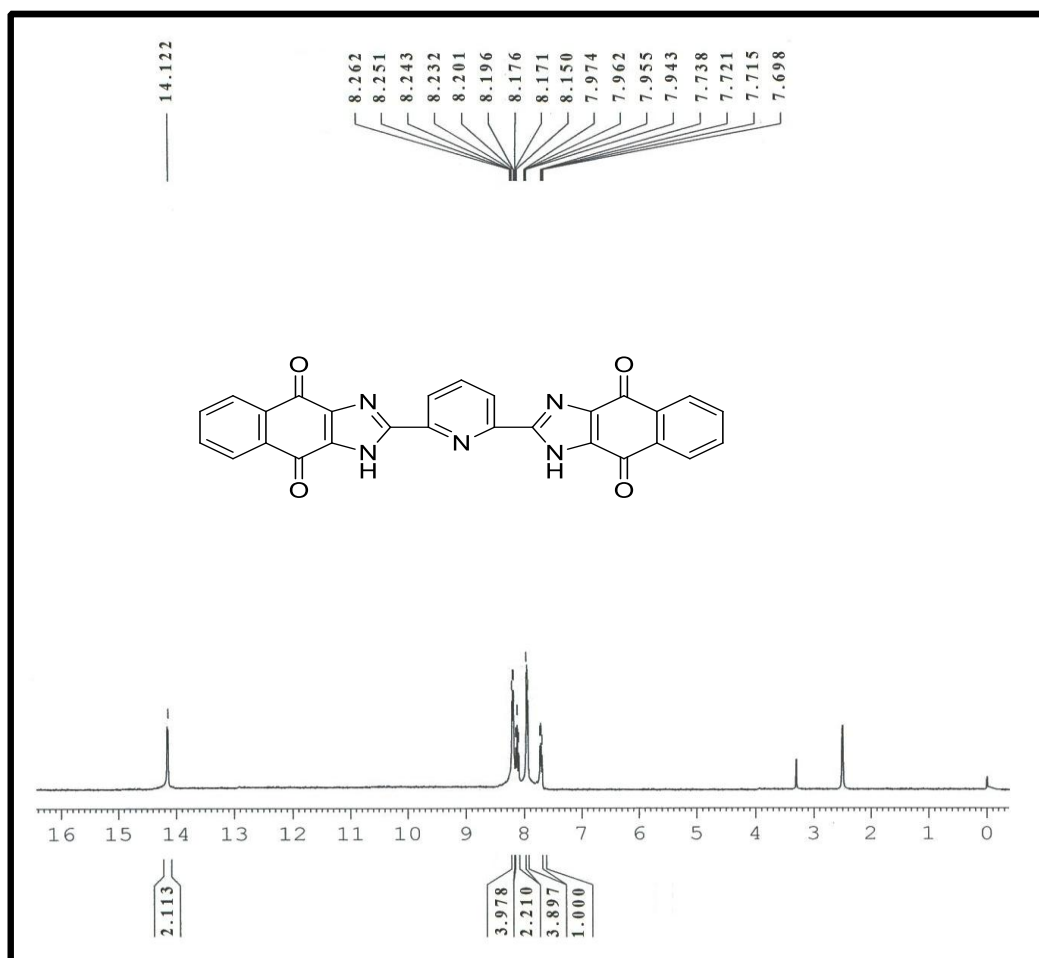

Fig. S15. <sup>1</sup>H NMR spectrum of receptor **R**



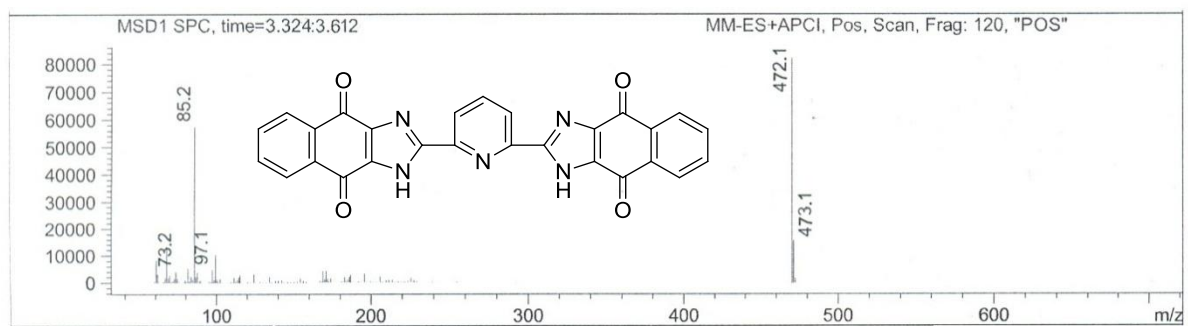

**Fig. S16.** LCMS spectrum of receptor **R**
